# Supplementary material
Source: publisher figshare collection journal article supplement (https://frontiersin.figshare.com/ndownloader/files/13607495)
Supplement: Supplementary file 1 [file 13607495]

## Sheet: MeanPreyFA_TableS2
Table S2: Mean fatty acid profiles (mass % of total fatty acids) for the complete prey library (n = 51) and mean prey lipid content (% of wet weight).
Species	A. felis	A. cornuta	A. aculeatus	A. sladeni	A. scintillans	A. infans	B. pacificus	B. dentata	B. anonychus	C. macouni	C. c. f. calyx	D. gigas	D. perspicillatus	D. theta	D. multistriatus	E. risso	G. phyllura	G. borealis	G. berryi	H. sherborni	I. elongatus	I. antrostomas	L. urophaos	L. yaquinae	L. jordani	L. ringens	L. ochotensis	M. microstoma	M. lugubris	M. bericoides	M. zugmayeri	N. regale	O. deletron	O. bartramii	O. borealijaponica (Adult)	O. borealijaponica (Subadult)	O. mitsuii	P. crassiceps	P. milleri	S. abei	S. harryi	S. gracilis	S. rothschildi	S. leucopsarus	S. nannochir	S. dofleini	S. californiensis	T. macropus	T. borealis
% Lipid	3.49	4.75	2.98	7.74	8.43	11.35	1.68	17.05	3.66	3.37	3.83	10.38	3.33	3.45	17.76	4.89	2.02	2.46	23.47	8.22	12.4	4.63	8.23	13.25	3.59	2.18	9.45	2.17	27.44	2.04	5.58	10.65	3.13	4.41	5.54	2.06	7.14	10.23	2.3	3.01	5.61	13.5	2.75	17.69	16.25	1	9.01	6.89	2.31
Fatty Acid Composition
14:0*	4.73142	2.38024	4.5191	5.93941	3.64073	2.62974	4.11123	0.520156	3.44069	3.0197	2.74973	3.55858	4.7	3.72074	3.06969	5.43	2.4	1.90981	2.31046	5.18844	6.55	2.75945	3.46896	2.94	3.53106	2.06041	3.62964	5.94881	2.82972	3.53965	4.12041	2.57026	2.27954	2.0102	2.75083	2.59078	3.47965	5.33947	4.10205	5.28	6.19814	6.88862	1.69017	5.59	2.54025	0.809838	5.12949	4.07	1.38028
14:1n-5*	0.040012	0.030003	0.069986	0.079992	0.090018	0.079992	0.060018	0.140042	0.040008	0.109989	0.059994	0.04998	0.06	0.05001	0.039996	0.07	0.06	0.039996	0.040008	0.089973	0.08	0.04999	0.069979	0.13	0.040012	0.040008	0.019998	0.089982	0.039996	0.029997	0.180018	0.110011	0.04999	0.010001	0.030009	0.020006	0.059994	0.139986	0.090045	0.1	0.129961	0.24995	0	0.06	0.390039	0.069986	0.049995	0.13	0.030006
i-15:0	0.180054	0.110011	0.179964	0.239976	0.170034	0.139986	0.260078	0.090027	0.15003	0.169983	0.09999	0.179928	0.27	0.20004	0.109989	0.19	0.06	0.079992	0.15003	0.329901	0.27	0.129974	0.179946	0.26	0.160048	0.120024	0.09999	0.469906	0.129987	0.239976	0.160016	0.120012	0.089982	0.080008	0.090027	0.070021	0.139986	0.309969	0.18009	0.3	0.279916	0.24995	0.150015	0.17	0.270027	0.019996	0.189981	0.19	0.05001
15:0*	0.510153	0.380038	0.519896	0.719928	0.55011	0.259974	0.510153	0.060018	0.430086	0.339966	0.289971	0.669732	0.77	0.560112	0.409959	0.49	0.35	0.239976	0.170034	0.79976	0.94	0.329934	0.479856	0.28	0.460138	0.370074	0.729927	0.609878	0.329967	0.779922	0.460046	0.280028	0.279944	0.340034	0.380114	0.330099	0.549945	0.459954	0.490245	0.67	0.719784	0.44991	0.450045	0.45	0.10001	0.169966	0.489951	0.41	0.230046
16:0*	12.5338	12.3512	16.5167	14.5985	19.3739	8.69913	11.4034	3.81114	9.33187	9.50905	11.0989	22.1511	21.22	17.8036	20.5379	17	17.93	12.3788	3.84077	18.1945	19.25	16.2368	17.3348	5.54	16.785	15.223	22.6277	11.7477	9.09909	18.5281	16.0516	9.12091	11.4877	14.3014	14.0042	13.8041	20.238	7.34927	15.4677	15.47	21.5535	14.7171	18.2818	14.49	1.92019	18.7562	15.4585	15.09	11.6023
16:1n-11	0.480144	0.290029	0.739852	0.919908	0.540108	0.359964	0.790237	0.110033	0.360072	0.49995	0.369963	0.569772	0.91	0.65013	0.269973	0.52	0.24	0.239976	0.190038	0.719784	1.14	0.329934	0.689793	0.67	0.430129	0.460092	0.519948	1.39972	0.339966	1.68983	0.350035	0.320032	0.319936	0.320032	0.410123	0.420126	0.469953	0.709929	0.54027	0.84	0.479856	0.479904	0.310031	0.55	0.320032	0.189962	0.549945	0.38	0.20004
16:1n-9	0.410123	0.270027	0.319936	0.369963	0.280056	0.219978	0.170051	0.180054	0.160032	0.319968	9.72903	0.239904	0.23	0.25005	0.209979	0.18	0.37	0.19998	0.140028	0.229931	0.43	0.69986	0.269919	0.21	0.20006	0.25005	0.229977	0.19996	0.09999	0.159984	0.310031	0.260026	0.269946	0.220022	0.190057	0.130039	0.259974	0.179982	0.250125	0.26	0.219934	0.179964	0.180018	0.22	0.250025	1.36973	0.209979	0.21	0.35007
16:1n-7*	2.15065	2.08021	5.009	4.55954	5.62112	6.64934	2.96089	10.9133	1.45029	9.29907	4.08959	3.66853	4.42	4.19084	3.46965	5.21	2.1	2.05979	2.4805	5.24843	3.49	5.019	3.91882	4.35	2.96089	3.05061	1.47985	3.5193	2.08979	1.9898	8.39084	4.38044	2.12957	1.40014	1.89057	1.15035	4.58954	3.85961	4.26213	5.42	8.42747	4.28914	2.72027	3.75	12.4412	1.36973	4.0396	6.18	1.4903
16:1n-5*	0.420126	0.110011	0.409918	0.669933	0.390078	0.359964	0.40012	0.310093	0.590118	0.479952	0.369963	0.259896	0.35	0.310062	0.159984	0.38	0.25	0.29997	0.180036	0.29991	0.37	0.189962	0.259922	0.37	0.310093	0.410082	0.209979	0.439912	0.179982	0.189981	0.180018	0.220022	0.329934	0.220022	0.440132	0.310093	0.239976	0.389961	0.290145	0.44	0.319904	0.369926	0.210021	0.42	0.750075	0.079984	0.379962	0.33	0.15003
17:1a*†	0.160048	0.130013	0.159968	0.189981	0.190038	0.09999	0.220066	0.140042	0.210042	0.129987	0.129987	0.169932	0.2	0.20004	0.079992	0.15	0.1	0.169983	0.120024	0.219934	0.25	0.179964	0.189943	0.2	0.110033	0.160032	0.219978	0.239952	0.069993	0.349965	0.170017	0.110011	0.159968	0.150015	0.210063	0.170051	0.169983	0.169983	0.18009	0.2	0.189943	0.119976	0.080008	0.1	0.190019	0.029994	0.119988	0.12	0.110022
i-17:0	0.290087	0.130013	0.29994	0.379962	0.310062	0.169983	0.20006	0.040012	0.190038	0.239976	0.159984	0.339864	0.29	0.330066	0.209979	0.22	0.19	0.179982	0.080016	0.289913	0.35	0.189962	0.309907	0.15	0.290087	0.190038	0.329967	0.209958	0.209979	0.309969	0.250025	0.160016	0.179964	0.190019	0.220066	0.170051	0.269973	0.209979	0.210105	0.26	0.259922	0.239952	0.280028	0.24	0.090009	0.129974	0.279972	0.22	0.180036
16:2n-6*	0.020006	0	0.029994	0.029997	0.030006	0	0.020006	0.040012	0.010002	0.059994	0	0.019992	0.03	0.020004	0	0.06	0	0.019998	0	0.019994	0.02	0.139972	0.019994	0.03	0.010003	0.010002	0	0.029994	0	0	0.020002	0	0	0	0	0	0.019998	0.039996	0.02001	0.03	0.019994	0.029994	0	0.05	0.10001	0	0.059994	0.03	0
17:1b*	0.40012	0.560056	0.719856	0.949905	0.620124	0.349965	0.960288	1.05032	0.530106	0.69993	0.669933	0.779688	1.26	0.70014	0.379962	0.52	0.26	0.809919	1.17023	0.809757	1.01	0.44991	0.849745	0.84	0.350105	0.720144	0.779922	0.939812	0.369963	1.61984	0.380038	0.490049	0.559888	0.680068	0.690207	0.960288	0.589941	0.619938	0.78039	0.97	1.08967	0.44991	0.170017	0.41	1.32013	0.069986	0.369963	0.54	0.60012
16:2n-4*	0.110033	0.030003	0.119976	0.149985	0.120024	0.09999	0.070021	0.260078	0.160032	0.209979	0.059994	0.089964	0.09	0.070014	0.049995	0.25	0.02	0.039996	0.060012	0.09997	0.08	0.089982	0.079976	0.1	0.080024	0.070014	0.029997	0.119976	0.029997	0.039996	0.10001	0.060006	0.04999	0.040004	0.060018	0.030009	0.069993	0.129987	0.08004	0.12	0.079976	0.109978	0.040004	0.22	0.430043	0.029994	0.239976	0.16	0
17:0*	0.60018	0.240024	0.429914	0.509949	0.310062	0.149985	0.30009	0.030009	0.380076	0.149985	0.19998	0.7497	0.64	0.540108	0.29997	0.38	0.39	0.369963	0.140028	0.629811	0.51	0.169966	0.479856	0.17	0.360108	0.320064	0.529947	0.219956	0.279972	0.689931	0.20002	0.160016	0.469906	0.540054	0.430129	0.410123	0.329967	0.209979	0.32016	0.47	0.379886	0.309938	0.460046	0.32	0.050005	0.34993	0.419958	0.17	0.420084
Phytanic acid	0.090027	0.030003	0.04999	0.029997	0.110022	0.019998	0.040012	1.09033	0.030006	0.329967	0.089991	0.069972	0.15	0.180036	0.049995	0.07	0.04	0.089991	0.060012	0.069979	0.02	0.04999	0.039988	0.03	0.080024	0.070014	0.019998	0.059988	0.059994	0.049995	0.050005	0.050005	0.109978	0.020002	0.040012	0.020006	0.079992	0.039996	0.030015	0.04	0.079976	0.069986	0.050005	0.03	0.280028	0.04999	0.089991	0.19	0.020004
16:3n-4*	0.030009	0	0.039992	0.029997	0.030006	0	0.030009	0.020006	0	0.039996	0.069993	0.039984	0.04	0.020004	0.009999	0.07	0	0.009999	0	0.029991	0.02	0.029994	0.019994	0	0.020006	0	0	0.059988	0	0.019998	0.020002	0	0.009998	0.010001	0	0	0.019998	0.039996	0.030015	0.03	0.029991	0.019996	0.030003	0.05	0.090009	0	0.059994	0.04	0
17:1*	0.30009	0.420042	0.589882	0.539946	0.720144	0.719928	0.360108	0.790237	0.220044	0.59994	0.269973	0.64974	0.43	0.610122	0.469953	0.4	0.28	0.339966	0.290058	0.49985	0.47	0.84983	0.689793	0.58	0.510153	0.540108	0.459954	0.319936	0.219978	0.619938	0.970097	0.470047	0.24995	0.220022	0.280084	0.180054	0.639936	0.319968	0.46023	0.56	0.719784	0.429914	0.760076	0.37	0.530053	0.209958	0.39996	0.49	0.20004
16:4n-3	0.060018	0	0.029994	0.049995	0.030006	0	0.020006	0.040012	0.020004	0.009999	0	0.039984	0.04	0.020004	0.009999	0.07	0	0.009999	0	0.039988	0.05	0.019996	0.019994	0	0.030009	0.030006	0.029997	0.029994	0	0.019998	0.020002	0	0.019996	0.020002	0.020006	0	0.029997	0.029997	0.02001	0.03	0.029991	0.029994	0	0.05	0	0	0.049995	0.02	0
16:4n-1*	0	0	0.04999	0.029997	0.010002	0	0.040012	0	0.020004	0.009999	0.069993	0	0.02	0.020004	0	0.21	0	0.009999	0.030006	0.039988	0	0.029994	0	0	0	0	0	0.039992	0	0	0	0	0	0	0.050015	0.020006	0	0.059994	0.050025	0.05	0.029991	0	0	0.02	0.110011	0	0.159984	0	0.090018
18:0*	2.62079	2.93029	3.92921	3.60964	2.61052	2.41976	2.88086	0.330099	1.21024	1.69983	1.92981	5.41783	4.57	4.991	5.22948	2.6	3.04	2.39976	1.5003	3.15905	3.51	1.77964	5.14846	1.23	3.41102	2.83057	6.42936	2.03959	1.93981	4.55954	3.17032	1.56016	3.14937	4.83048	3.14094	3.21096	3.34967	1.19988	3.4017	3.39	1.95941	4.0192	3.30033	2.8	0.310031	5.58888	2.92971	1.82	4.67093
18:1n-13	0.250075	0.080008	0.429914	0.379962	0.15003	0.339966	0.150045	0.040012	0.10002	0.169983	0.069993	0.119952	0.15	0.190038	0.069993	0.15	0.14	0.169983	0.05001	0.189943	0.17	0.109978	0.229931	0.39	0.150045	0.090018	0.129987	0.179964	0.079992	0.129987	0.10001	0.140014	0.14997	0.210021	0.160048	0.160048	0.119988	0.139986	0.2001	0.16	0.189943	0.119976	0.290029	0.15	0.010001	0.369926	0.159984	0.13	0.130026
18:1n-11	1.10033	0.540054	1.13977	1.28987	0.30006	0.819918	0.810243	0.220066	0.270054	0.429957	2.72973	0.09996	0.19	0.370074	0.089991	0.47	0.65	0.39996	0.330066	0.19994	0.19	0.169966	0.259922	0.86	0.30009	0.290058	0	0.889822	0.29997	0.119988	0.170017	0.470047	1.31974	0.790079	0.490147	0.580174	0.179982	0.689931	0.44022	0.41	0.119964	0.169966	0.130013	0.4	0.480048	0.259948	0.439956	0.41	1.74035
18:1n-9*	7.0021	29.0829	16.7766	10.9689	27.2955	30.157	11.0133	44.4033	4.18084	25.4775	12.2888	20.6317	16.02	22.8346	44.3056	11.14	10.63	19.688	20.8142	18.0846	19.48	42.1416	32.6302	17.79	20.7962	14.963	24.1576	8.36833	9.989	14.5985	30.043	27.4527	9.16817	10.011	10.043	8.37251	30.357	8.33917	19.6498	19.34	24.2127	25.5849	13.2713	13.08	21.9022	5.23895	10.9089	23.35	14.7329
18:1n-7*	2.31069	1.67017	2.4795	2.14979	2.56051	3.49965	1.95059	5.17155	0.770154	3.44966	1.92981	2.08916	1.8	1.80036	2.05979	1.7	2.81	2.20978	1.81036	2.23933	2.17	2.80944	2.22933	1.89	2.53076	2.14043	2.10979	1.69966	0.959904	2.60974	2.59026	2.9603	2.08958	1.40014	1.62049	1.15035	2.44976	1.34987	2.4012	2.35	2.01939	1.88962	2.87029	1.37	3.29033	2.66947	1.69983	2.9	2.12042
18:1n-5*	0.570171	0.120012	0.739852	1.13989	0.630126	0.589941	0.590177	0.660198	0.860172	0.749925	0.669933	0.34986	0.33	0.570114	0.229977	0.54	0.51	0.639936	0.20004	0.319904	0.45	0.329934	0.609817	0.99	0.440132	0.410082	0.259974	0.519896	0.309969	0.259974	0.320032	0.420042	0.609878	0.470047	0.620186	0.50015	0.429957	0.609939	0.50025	0.67	0.309907	0.579884	0.240024	0.63	1.25013	0.239952	0.59994	0.53	0.510102
18:2n-6*	1.50045	0.640064	1.44971	1.89981	1.47029	1.46985	1.31039	2.38071	1.27025	1.75982	1.42986	1.26949	1.05	1.06021	0.79992	1.24	0.59	1.10989	1.13023	1.0097	1.16	1.26975	1.3396	1.9	1.46044	1.53031	0.849915	1.28974	0.469953	0.839916	1.09011	1.0301	0.89982	0.720072	0.990297	0.720216	1.23988	1.0499	1.13057	1.48	0.979706	1.19976	1.41014	1.37	1.83018	0.309938	1.56984	1.21	0.780156
18:2n-4*	0.070021	0.030003	0.059988	0.069993	0.090018	0.049995	0.040012	0.090027	0.05001	0.079992	0.059994	0.069972	0.06	0.05001	0.039996	0.09	0.05	0.049995	0.060012	0.059982	0.06	0.079984	0.079976	0.06	0.060018	0.040008	0.049995	0.039992	0	0.059994	0.080008	0.050005	0.079984	0.040004	0.050015	0.040012	0.079992	0.059994	0.06003	0.05	0.059982	0.04999	0.030003	0.1	0.120012	0.039992	0.119988	0.07	0.030006
18:3n-6*	0.10003	0.150015	0.14997	0.179982	0.090018	0.079992	0.110033	0.10003	0.060012	0.029997	0.029997	0.14994	0.15	0.140028	0.079992	0.08	0.04	0.059994	0.070014	0.189943	0.14	0.139972	0.119964	0.05	0.090027	0.140028	0.19998	0.079984	0.079992	0.259974	0.070007	0.050005	0.059988	0.120012	0.080024	0.090027	0.109989	0.119988	0.12006	0.18	0.109967	0.059988	0.110011	0.06	0.080008	0.019996	0.079992	0.05	0.060012
18:3n-4*	0.210063	0.190019	0.139972	0.129987	0.160032	0.189981	0.130039	0.180054	0.20004	0.159984	0.119988	0.14994	0.16	0.15003	0.09999	0.09	0.06	0.169983	0.140028	0.179946	0.11	0.169966	0.149955	0.18	0.150045	0.090018	0.069993	0.109978	0.129987	0.119988	0.140014	0.220022	0.129974	0.130013	0.120036	0.130039	0.149985	0.119988	0.130065	0.18	0.209937	0.119976	0.130013	0.13	0.160016	0.029994	0.149985	0.14	0.130026
18:3n-3*	1.20036	0.190019	0.819836	1.33987	0.780156	0.659934	0.610183	0.890267	1.14023	0.749925	0.329967	0.659736	0.52	0.530106	0.409959	0.84	0.25	0.629937	0.510102	0.539838	0.91	0.519896	0.669799	0.74	0.80024	0.870174	0.69993	0.64987	0.139986	0.369963	0.490049	0.380038	0.589882	0.520052	0.810243	0.550165	0.559944	0.689931	0.46023	0.69	0.479856	0.769846	0.570057	1.26	0.760076	0.14997	1.12989	0.45	0.370074
18:3n-1*	0.20006	0.240024	0.259948	0.329967	0.270054	0.149985	0.420126	0.350105	0.260052	0.239976	0.289971	0.29988	0.46	0.30006	0.149985	0.23	0.14	0.329967	0.380076	0.369889	0.42	0.229954	0.339898	0.31	0.160048	0.310062	0.339966	0.409918	0.139986	0.679932	0.180018	0.180018	0.279944	0.270027	0.320096	0.370111	0.259974	0.279972	0.30015	0.35	0.409877	0.179964	0.080008	0.17	0.50005	0.019996	0.179982	0.21	0.260052
18:4n-3*	1.85056	0.160016	1.56969	2.20978	0.930186	0.279972	0.610183	0.670201	1.91038	0.49995	0.159984	0.94962	1.22	0.660132	0.359964	3.35	0.23	0.669933	0.330066	0.669799	1.62	0.669866	0.739778	0.54	1.18035	1.24025	0.359964	0.629874	0.109989	0.29997	0.350035	0.270027	0.619876	0.830083	1.36041	0.70021	0.639936	1.25987	0.410205	0.99	0.959712	1.21976	0.090009	3.78	0.510051	0.089982	2.90971	0.56	0.190038
18:4n-1*	0.030009	0.020002	0.069986	0.049995	0.040008	0.009999	0.060018	0.040012	0	0.049995	0.029997	0.04998	0.05	0.030006	0.019998	0.06	0.07	0.009999	0	0.079976	0.03	0.04999	0.029991	0.05	0.030009	0.010002	0.009999	0.039992	0	0.019998	0.010001	0.010001	0.019996	0.020002	0.020006	0.020006	0.019998	0.079992	0.050025	0.06	0.039988	0.029994	0	0.13	0.120012	0.19996	0.189981	0.03	0.030006
20:00:00	0.110033	0.420042	0.119976	0.129987	0.160032	0.149985	0.150045	0	0.160032	0.069993	0.119988	0.189924	0.17	0.260052	0.189981	0.22	0.04	0.129987	0.590118	0.229931	0.2	0.069986	0.209937	0.11	0.260078	0.10002	0.419958	0.14997	0.379962	0.249975	0.130013	0.120012	0.129974	0.170017	0.150045	0.160048	0.19998	0.239976	0.16008	0.22	0.089973	0.159968	0.090009	0.2	0.040004	0.139972	0.209979	0.18	0.140028
20:1n-11	7.6823	6.38064	3.52929	5.0295	5.5111	9.29907	11.5335	8.63259	13.5927	10.9089	12.2888	0.89964	1.76	7.35147	1.45985	6.73	1.78	8.60914	9.87197	2.05938	1.95	1.07978	4.19874	14.14	5.48164	2.72054	0.229977	9.20816	15.4085	1.07989	1.50015	9.961	8.59828	7.34073	7.10213	9.6829	3.13969	14.6885	6.50325	8.49	1.57953	6.22875	0.240024	8.94	16.1016	0.759848	7.53925	8.55	8.25165
20:1n-9*	4.87146	9.57096	1.66967	1.9898	3.03061	5.22948	3.56107	3.46104	4.27085	4.74953	6.0394	1.35946	1.73	2.37047	3.68963	2.62	6.82	5.28947	12.7025	2.73918	3.32	3.42931	2.88913	5.47	4.49135	1.34027	12.5887	4.44911	4.90951	3.53965	3.67037	7.55076	6.71866	6.37064	5.98179	7.0021	5.28947	5.20948	5.27264	2.74	1.69949	2.73945	0.650065	2.47	6.9907	8.88822	2.37976	4.09	11.0122
20:1n-7*	0.320096	0.250025	0.189962	0.259974	0.260052	0.579942	0.520156	0.320096	0.290058	0.39996	0.289971	0.139944	0.24	0.340068	0.19998	0.16	0.14	0.29997	0.540108	0.309907	0.44	0.139972	0.29991	0.56	0.260078	0.15003	0.839916	0.69986	0.209979	0.529947	0.20002	0.370037	0.269946	0.290029	0.370111	0.410123	0.29997	0.559944	0.470235	0.46	0.179946	0.209958	0.10001	0.19	0.430043	0.14997	0.219978	0.3	0.370074
20:2n-9	0.140042	0.060006	0.209958	0.269973	0.120024	0.109989	0.140042	0.080024	0.270054	0.159984	0.119988	0.079968	0.08	0.15003	0.059994	0.17	0.05	0.149985	0.170034	0.109967	0.1	0.029994	0.109967	0.18	0.090027	0.05001	0.069993	0.119976	0.189981	0.059994	0.060006	0.10001	0.109978	0.170017	0.140042	0.190057	0.089991	0.269973	0.14007	0.2	0.089973	0.179964	0.040004	0.2	0.10001	0	0.219978	0.14	0.120024
20:2n-6*	0.980294	0.220022	0.34993	0.409959	0.280056	0.539946	0.420126	0.30009	0.710142	0.309969	0.649935	0.379848	0.36	0.280056	0.219978	0.22	0.77	0.859914	0.660132	0.339898	0.55	0.279944	0.289913	0.47	0.340102	0.310062	0.629937	0.429914	0.109989	0.579942	0.390039	0.370037	1.05979	0.590059	0.790237	0.810243	0.349965	0.369963	0.410205	0.28	0.209937	0.269946	0.370037	0.3	0.240024	0.639872	0.359964	0.23	0.890178
20:3n-6*	0.160048	0.130013	0.109978	0.129987	0.080016	0.119988	0.10003	0.080024	0.130026	0.079992	0.109989	0.119952	0.1	0.10002	0.069993	0.09	0.14	0.129987	0.210042	0.129961	0.12	0.129974	0.109967	0.17	0.10003	0.110022	0.129987	0.089982	0.059994	0.149985	0.120012	0.090009	0.109978	0.120012	0.140042	0.150045	0.109989	0.089991	0.130065	0.09	0.049985	0.079984	0.10001	0.11	0.050005	0.019996	0.169983	0.08	0.170034
20:4n-6*	1.25038	0.940094	1.03979	0.789921	0.45009	0.709929	1.60048	0.30009	0.540108	0.509949	0.549945	0.839664	1.16	0.55011	0.409959	0.55	2.22	0.939906	0.870174	0.89973	1.11	1.0198	0.569829	0.59	0.920276	1.55031	0.569943	1.28974	0.309969	3.45965	0.90009	0.590059	0.689862	0.880088	0.930279	0.970291	0.709929	0.589941	1.27064	1.08	0.409877	0.459908	1.81018	0.51	0.20002	1.92961	0.729927	0.45	1.44029
20:3n-3*	0.80024	0.090009	0.219956	0.249975	0.120024	0.219978	0.120036	0.070021	0.620124	0.109989	0.189981	0.19992	0.15	0.120024	0.109989	0.17	0.89	0.539946	0.35007	0.159952	0.27	0.119976	0.179946	0.18	0.150045	0.190038	0.249975	0.129974	0.029997	0.189981	0.180018	0.130013	1.41972	0.450045	0.410123	0.550165	0.139986	0.159984	0.18009	0.13	0.109967	0.169966	0.240024	0.23	0.050005	0.509898	0.239976	0.07	0.360072
20:4n-3*	1.13034	0.40004	1.57968	2.47975	0.60012	1.13989	0.520156	0.340102	1.12022	0.539946	0.449955	0.9996	0.53	0.640128	0.519948	0.48	0.34	0.739926	0.680136	1.06968	1.01	0.639872	0.769769	1.58	0.740222	1.24025	1.06989	0.79984	0.079992	0.669933	0.570057	0.540054	0.679864	0.910091	1.07032	1.23037	0.629937	0.419958	0.630315	0.35	0.439868	0.629874	0.450045	1.82	0.270027	0.169966	1.51985	0.32	0.590118
20:5n-3*	13.9942	1.37014	7.53849	8.69913	2.35047	3.41966	4.70141	1.24037	8.17163	2.25977	3.75962	6.92723	5.43	2.83057	1.81982	5.94	16.13	7.21928	1.95039	5.94822	6.89	3.61928	3.03909	1.78	5.10153	10.052	3.41966	4.67906	0.449955	7.26927	4.61046	2.0102	11.2677	8.15082	9.88296	8.28248	2.66973	3.17968	4.16208	2.64	3.55893	4.4891	11.4511	6.16	0.690069	18.7263	7.45925	1.63	10.9222
22:1n-11*	6.05182	12.8313	3.93921	4.65953	8.09162	6.46935	12.6638	5.77173	15.7331	10.469	13.9786	1.14954	2.21	8.65173	1.92981	11.05	1.47	8.56914	20.4741	3.80886	2.13	1.53969	5.37839	20.94	8.83265	2.41048	0.389961	17.0066	38.9761	1.16988	2.22022	15.1015	8.42831	7.67077	7.31219	10.2731	4.11959	25.7874	6.56328	10.2	3.09907	7.63847	0.20002	14.32	16.4116	0.329934	12.4388	15.21	6.26125
22:1n-9*	0.550165	1.94019	0.479904	0.549945	0.760152	0.769923	1.08032	0.60018	0.860172	1.34987	1.47985	0.39984	0.96	1.14023	0.569943	0.63	0.45	0.749925	3.12062	1.68949	1.03	0.359928	0.609817	1.96	0.60018	0.280056	2.64974	1.24975	1.9698	1.16988	0.60006	1.39014	0.959808	0.770077	0.760228	0.780234	0.909909	2.21978	1.01051	1.22	1.05968	0.759848	0.170017	0.77	1.54015	0.509898	0.809919	1.26	0.960192
22:1n-7*	0.130039	0.160016	0.109978	0.129987	0.15003	0.09999	0.160048	0.060018	0.290058	0.129987	0.219978	0.069972	0.11	0.190038	0.079992	0.15	0.04	0.139986	0.380076	0.19994	0.13	0.04999	0.119964	0.14	0.170051	0.060012	0.539946	0.139972	0.439956	0.109989	0.10001	0.160016	0.159968	0.140014	0.130039	0.160048	0.109989	0.329967	0.130065	0.21	0.149955	0.179964	0.080008	0.25	0.170017	0.04999	0.269973	0.27	0.10002
21:5n-3*	0.330099	0.080008	0.269946	0.329967	0.130026	0.119988	0.10003	0.120036	0.340068	0.129987	0.09999	0.269892	0.2	0.110022	0.09999	0.27	0.14	0.19998	0.10002	0.219934	0.22	0.129974	0.09997	0.12	0.160048	0.220044	0.149985	0.079984	0	0.179982	0.130013	0.060006	0.24995	0.280028	0.310093	0.330099	0.109989	0.149985	0.110055	0.07	0.149955	0.169966	0.190019	0.37	0.10001	0.269946	0.379962	0.1	0.160032
22:4n-6*	0.080024	0.30003	0.129974	0.109989	0.090018	0.149985	0.220066	0.060018	0.080016	0.059994	0.059994	0.159936	0.19	0.15003	0.149985	0.09	0.1	0.079992	0.360072	0.259922	0.22	0.14997	0.119964	0.2	0.150045	0.170034	0.19998	0.259948	0.149985	0.559944	0.270027	0.180018	0.09998	0.140014	0.090027	0.140042	0.169983	0.209979	0.270135	0.21	0.129961	0.119976	0.250025	0.09	0.010001	0.119976	0.129987	0.12	0.120024
22:5n-6*	0.250075	0.270027	0.339932	0.309969	0.120024	0.189981	0.820246	0.060018	0.30006	0.119988	0.159984	0.329868	0.61	0.210042	0.09999	0.26	0.25	0.169983	0.280056	0.519844	0.56	0.259948	0.179946	0.35	0.220066	0.460092	0.179982	0.919816	0.059994	1.0499	0.280028	0.160016	0.189962	0.360036	0.260078	0.340102	0.19998	0.309969	0.44022	0.32	0.179946	0.129974	0.420042	0.19	0.030003	0.289942	0.249975	0.1	0.220044
22:4n-3*	0.060018	0.030003	0.079984	0.09999	0.030006	0.069993	0.050015	0	0.070014	0.029997	0.039996	0.039984	0.04	0.040008	0.029997	0.04	0	0.029997	0.070014	0.049985	0.05	0.029994	0.019994	0.06	0.030009	0.05001	0.069993	0.04999	0	0.039996	0.040004	0.020002	0.039992	0.090009	0.070021	0.090027	0.039996	0.059994	0.050025	0.03	0.029991	0.039992	0.030003	0.06	0	0	0.069993	0	0
22:5n-3	0.640192	0.510051	1.15977	1.06989	0.430086	1.17988	1.03031	0.210063	0.540108	0.429957	0.289971	0.809676	0.68	0.510102	0.69993	0.53	0.46	0.449955	0.890178	0.819754	0.78	0.559888	0.509847	0.78	0.580174	1.4803	1.0199	1.82963	0.09999	1.16988	1.0201	0.570057	0.54989	1.16012	0.780234	1.08032	0.59994	0.519948	0.990495	0.42	0.389883	0.489902	1.9502	0.65	0.160016	0.739852	0.869913	0.25	0.720144
22:6n-3*	17.3352	5.74057	15.4169	14.8385	5.70114	6.54935	15.6447	2.63079	19.884	4.46955	5.27947	16.2735	18.27	8.0116	3.10969	13.67	23.19	15.6484	4.24085	14.1658	12.38	7.33853	5.3384	5	11.5535	26.7453	5.87941	11.7477	1.12989	20.058	10.7411	5.24052	18.9862	21.9522	20.3461	19.0557	7.0093	6.24938	12.9765	7.2	9.72708	7.61848	31.8532	8.21	2.22022	26.6747	10.7689	4.09	13.4827
24:1*	0.60018	2.72027	0.69986	0.729927	1.0202	1.15988	1.25038	0.50015	2.0204	0.939906	1.17988	1.7593	2.17	1.87037	0.69993	1.51	0.33	1.0199	2.71054	3.12906	0.82	0.609878	1.0097	1.39	1.49045	1.26025	1.08989	1.02979	4.0096	0.919908	1.08011	1.21012	1.06979	0.860086	0.960288	0.930279	0.909909	1.78982	1.02051	1.6	3.36899	1.55969	0.930093	0.97	0.70007	0.14997	1.14989	1.73	0.85017
* Dietary fatty acid
† 17 C fatty acids with one double bond and a methyl branch. Locations of the double bond and methyl branch are unknown, but differ between 17:1a and 17:1b.
[truncated: 2 more columns]
